# Supplementary material for: Cobalt Catalyzed Fischer-Tropsch Synthesis with O2-Containing Syngas
Source: MDPI journal article supplement (doi:10.3390/catal13020391), 2023-02-10
Supplement: s1 [file s1]

# Cobalt Catalyzed Fischer-Tropsch Synthesis with O<sub>2</sub>-Containing Syngas

Alexander Herbers\*, Christoph Kern, Andreas Jess

Chair of Chemical Engineering, Center of Energy Technology, University of Bayreuth,  
95447 Bayreuth, Germany.

\* Correspondence: alexander.herbers@uni-bayreuth.de

## Appendix

The in-situ XRD measurements show the formation of only CoO in case of reoxidation of the Co-catalyst at near FTS conditions (5 bar, 230 °C). (Figure S1).

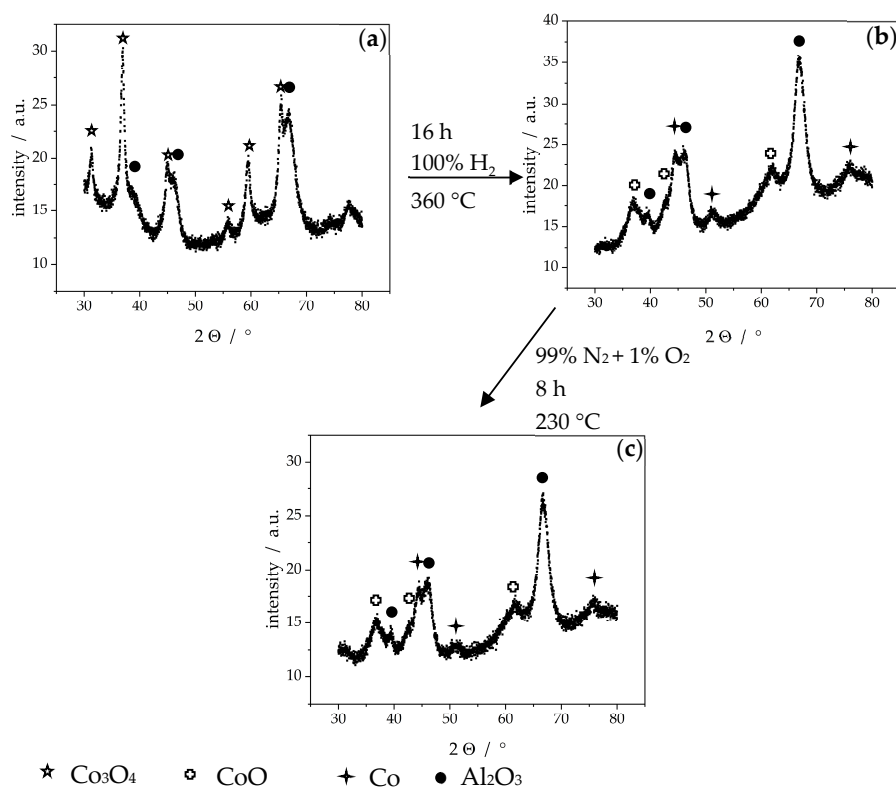

**Figure S1.** (a) X-Ray Diffractogram of fresh Co/Pt/Al<sub>2</sub>O<sub>3</sub> catalyst. (b) Diffractogram of reduced Co/Pt/Al<sub>2</sub>O<sub>3</sub> catalyst. (c) Diffractogram of re-oxidized Co/Pt/Al<sub>2</sub>O<sub>3</sub> catalyst. Conditions:  $T = 230\text{--}360\text{ }^\circ\text{C}$ ;  $p = 5\text{ bar}$ ;  $V_{\text{total}} = 7\text{ l/h}$  (NTP);  $p_{\text{H}_2} = 0\text{--}5\text{ bar}$ ,  $p_{\text{N}_2} = 0\text{--}4.95\text{ bar}$ ;  $p_{\text{O}_2} = 0\text{--}0.05\text{ bar}$ ;  $m_{\text{cat}}$  (Co/Pt/Al<sub>2</sub>O<sub>3</sub>) = 0.5 g.

The fresh catalyst shows the characteristic reflexes of the  $\text{Co}_3\text{O}_4$  phase (at  $31.1^\circ$ ,  $36.7^\circ$ ,  $44.7^\circ$ ,  $59.1^\circ$  and  $65^\circ$  (Figure S1a). A mixture of metallic Co and CoO is left after reduction at  $360\text{ }^\circ\text{C}$  in hydrogen for 16 h. The XRD results show the corresponding reflexes for CoO at  $36.5^\circ$ ,  $42.3^\circ$  and  $61.3^\circ$  and at  $44.2^\circ$ ,  $51.7^\circ$  and  $75.9^\circ$  for metallic Co (case b). After reoxidation at  $230\text{ }^\circ\text{C}$  for 8 h the peaks for metallic Co decrease and for CoO increase but no reflections for  $\text{Co}_3\text{O}_4$  are measured (case c). This suggests that at elevated temperature the oxidation of Co is to CoO only.

To compare the effect of the catalyst reduction treatment on the O<sub>2</sub>-product selectivity the reduction degree of a pure Co catalyst was monitored to see if cobalt was reduced without Pt added to the active catalyst with regard to molecular oxygen (Figure S2).

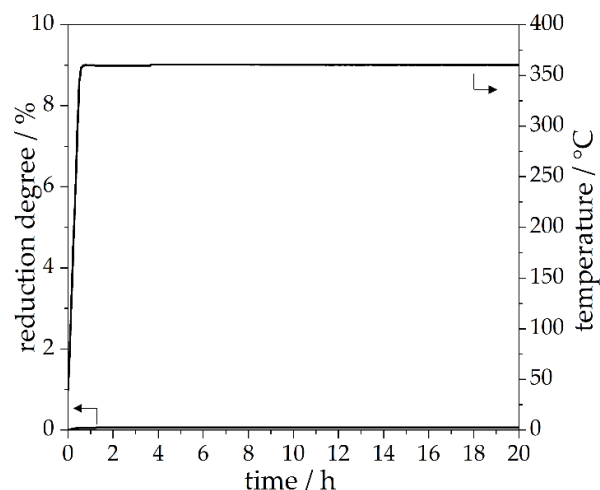

**Figure S2.** Reduction degree of Co/Al<sub>2</sub>O<sub>3</sub> catalyst over time in H<sub>2</sub> atmosphere. Conditions:  $p = 1$  bar;  $\dot{V}_{total} = 30$  l/h (NTP);  $m_{cat}$  (Co/ Al<sub>2</sub>O<sub>3</sub>) = 0.1 g;  $T = 0 - 360$  °C.

As shown in Figure S2 cobalt is still in its oxidized form on Al<sub>2</sub>O<sub>3</sub> in pure H<sub>2</sub> atmosphere at 360 °C. This is expected as a typical FTS catalyst has a reduction enhancement promoter added because metallic cobalt is formed only at very high temperature (> 500 °C) without such a promotor.
